# Supplementary material for: Distinctive expression patterns of glycoprotein non-metastatic B and folliculin in renal tumors in patients with Birt–Hogg–Dubé syndrome
Source: PubMed Central journal article supplement — Cancer Sci. 2015 Feb 17;106(3):315–23. doi: 10.1111/cas.12601 (PMC4376441; doi:10.1111/cas.12601), 2015-02-17
Supplement: cas0106-0315-sd1.pdf [file cas0106-0315-sd1.pdf]

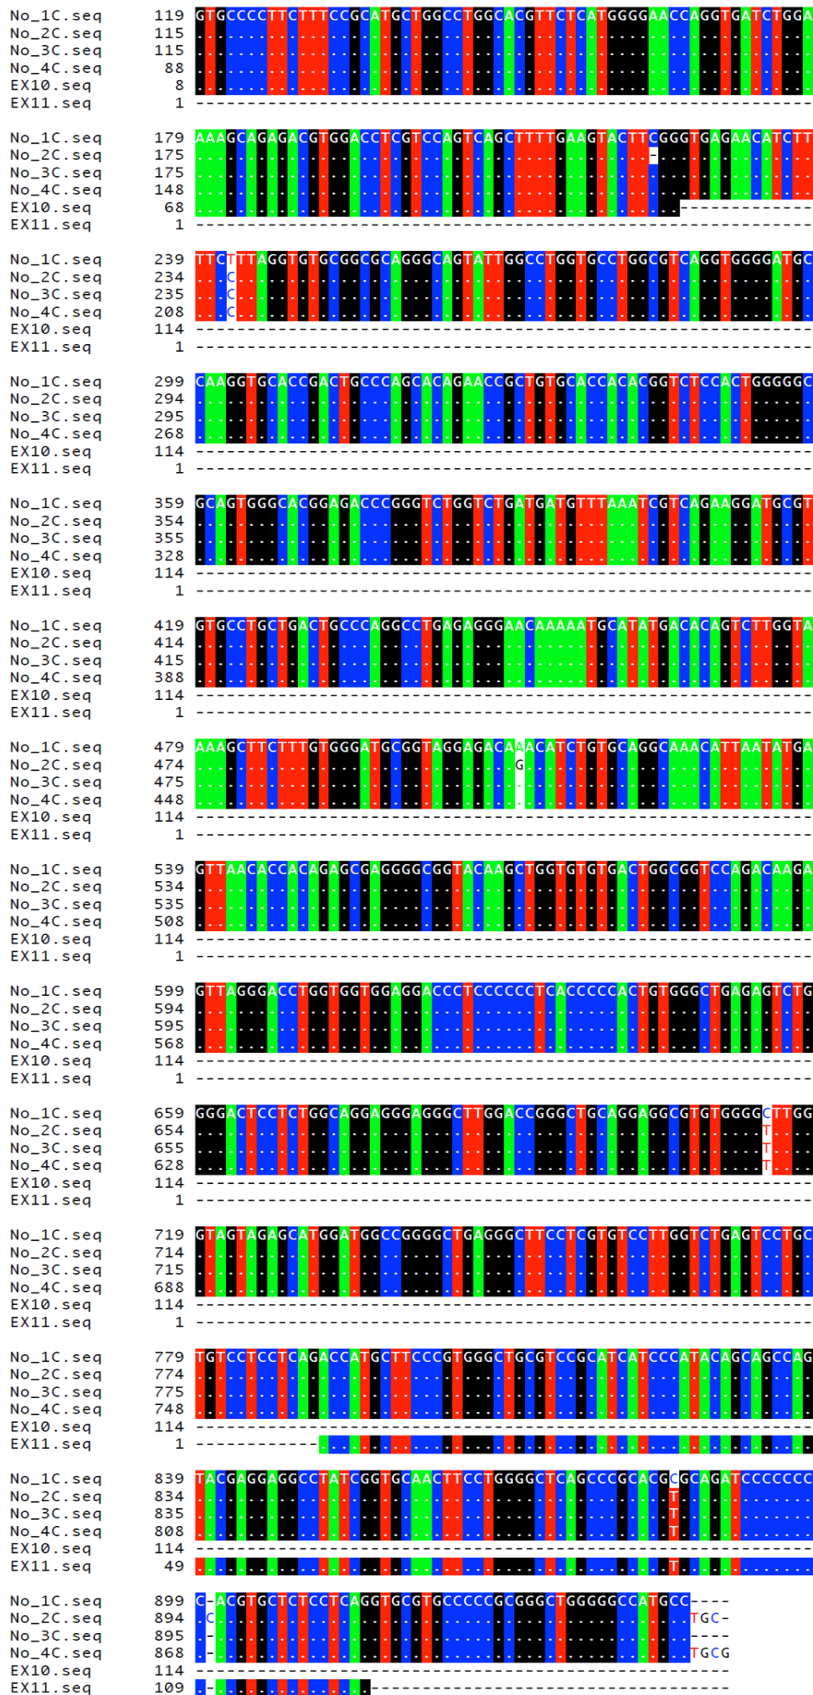

**Fig. S1. Cloning from exon 10 to exon 11 of FLCN in BHD9-T2.**

Exon 10 (114bp) and exon 11 (124bp) are intervened by intron 10 (565bp). The sequence results of 4 clones (No. 1C-4C) are exhibited. Ex10 and Ex11 indicate wild-type sequences. Clone-2 (No. 2C) simultaneously shows somatic mutation in exon 10 (the second line from the top) and germline mutation in exon 11 (the bottom line).
